# Supplementary material for: Crystal structure of a heterodimer of editosome interaction proteins in complex with two copies of a cross-reacting nanobody
Source: PubMed Central journal article supplement — Nucleic Acids Res. 2011 Oct 27;40(4):1828–40. doi: 10.1093/nar/gkr867 (PMC3287191; doi:10.1093/nar/gkr867), 2011-10-27
Supplement: supp_gkr867_Park_A3A6Nb14_paper_NAR_Supp_gkr867.pdf [file supp_gkr867_Park_A3A6Nb14_paper_NAR_Supp_gkr867.pdf]

## SUPPLEMENTARY INFORMATION

### **Crystal structure of a heterodimer of editosome interaction proteins in complex with two copies of a cross-reacting nanobody**

Young-jun Park<sup>1</sup>, Els Pardon<sup>2,3</sup>, Meiting Wu<sup>1,#</sup>, Jan Steyaert<sup>2,3</sup> and Wim G.J. Hol<sup>1,\*</sup>

<sup>1</sup>Biomolecular Structure Center, Department of Biochemistry, School of Medicine, University of Washington, P.O. Box 357742, Seattle WA 98195, USA

<sup>2</sup>Structural Biology Brussels, Vrije Universiteit Brussel, B-1050 Brussels, Belgium

<sup>3</sup>Department of Structural Biology, VIB, Vrije Universiteit Brussel, B-1050 Brussel

# Present address: Department of Bioengineering, Foege Hall N330Q, University of Washington, Seattle

\* To whom correspondence should be addressed. Email address: wghol@u.washington.edu

## SUPPLEMENTARY FIGURES

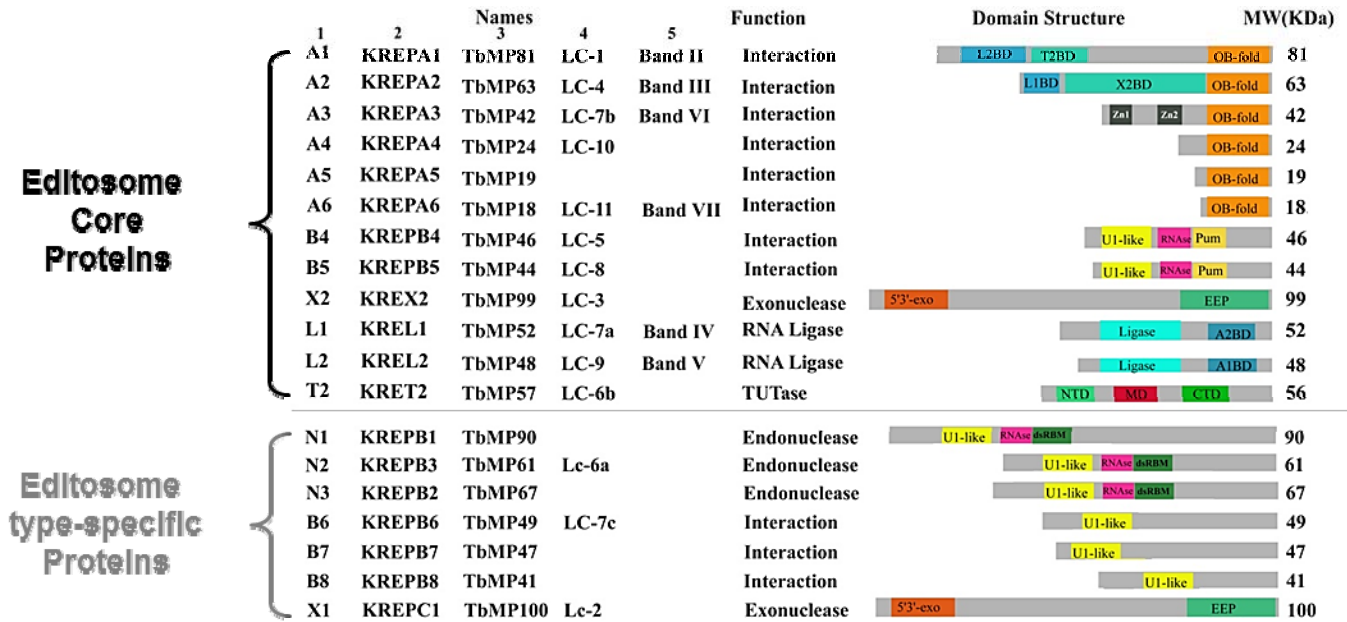

**Supplementary Figure S1. Editosome proteins in *T. brucei*.** First column: the short protein names used in this application (1,2). **Second, third, fourth** and **fifth** columns: alternative nomenclatures from, respectively (3-7). **Last** column: molecular weights of full length proteins in *T. brucei*. The structurally identified (8-10) or putative (4) domains are: **L1BD** = L1-binding domain; **T2BD** = T2 binding domain; **OB-fold** in six OB-fold interaction proteins; **L2BD** = L2-binding domain; **X2BD** = X2-binding domain; **U1-like** = U1-like zinc-finger domains in the endonucleases **N1, N2, N3** and the interaction proteins **B4, B5, B6, B7 and B8**; **RNase III** = RNase-III-like motifs; **Pum** = Pumilio domain; **5'3'exo** = domain with structural homology to 5'→3' exoribonuclease domain; **EEP** = endonuclease/exonuclease/phosphatase domain; **Ligase** = ligase domain; **A1BD** = A1-binding domain; **A2BD** = A2-binding domain; **NTD** = N-terminal, **MD** = middle and **CTD** = C-terminal domain of the 3'-terminal uridylyl transferase (TUTase) T2. **Zn1** in A3 is a Zn-finger motif which is also present in the L2BD of A1 and the L1BD of A2. **Zn2** in A3 is a Zn-finger motif which is also present in the T2BD of A1 and the X2BD of A2.

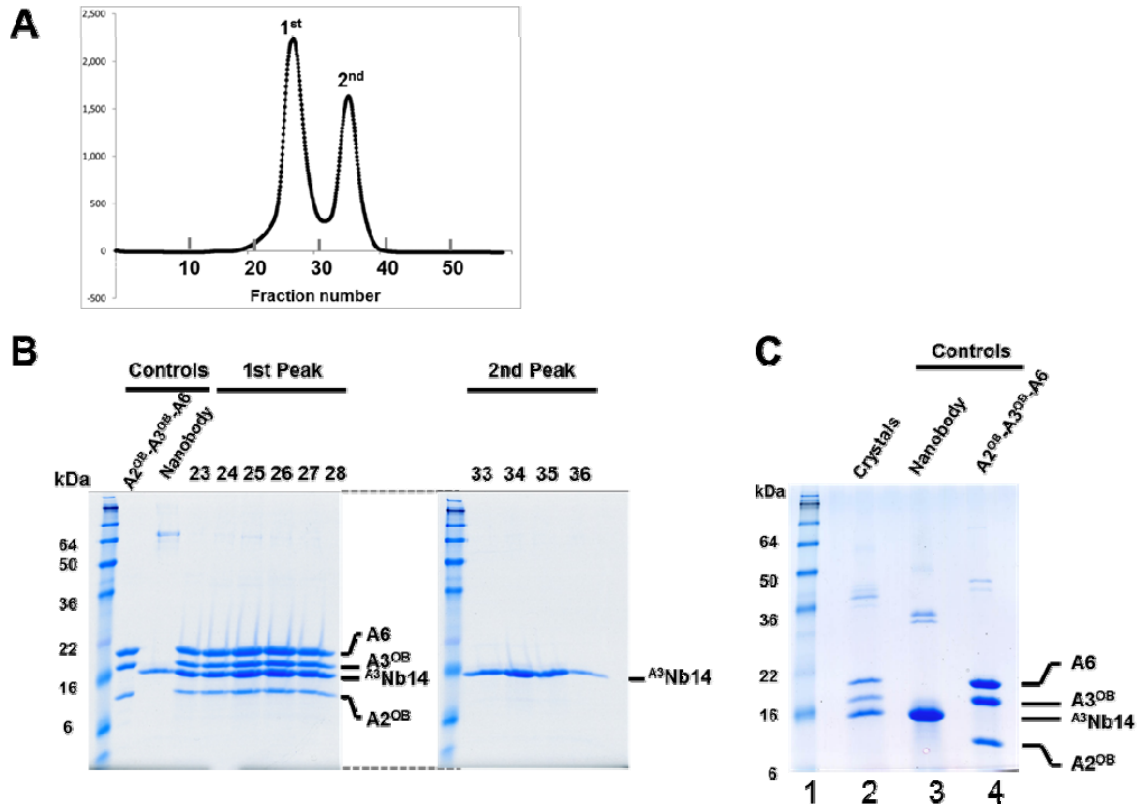

**Supplementary Figure S2. Preparation of A2<sup>OB</sup>-A3<sup>OB</sup>-A6-A<sup>3</sup>Nb14 complexes.**

**(A) SEC and SDS-PAGE of A2<sup>OB</sup>-A3<sup>OB</sup>-A6-A<sup>3</sup>Nb14 complex.** The A2<sup>OB</sup>-A3<sup>OB</sup>-A6-A<sup>3</sup>Nb14 complex was purified by gel filtration over a Superdex 200 sizing column. Chromatographic absorbance traces at 280 nm are shown for the A2<sup>OB</sup>-A3<sup>OB</sup>-A6-A<sup>3</sup>Nb14 complex (1<sup>st</sup> peak) and unbound A<sup>3</sup>Nb14 (2<sup>nd</sup> peak), as indicated.

**(B) Proteins from the major peaks in (A) analyzed on an 8-16% SDS-PAGE gel.** Lanes 1 and 10: Molecular weight markers; lanes 2 and 3: A2<sup>OB</sup>-A3<sup>OB</sup>-A6 and nanobody A<sup>3</sup>Nb14 as controls; lanes 4-9: 1<sup>st</sup> gel filtration peak fractions 23 to 28; lanes 11-14: 2<sup>nd</sup> peak fractions 33 to 35. The lanes shown are all from the same gel – the gel has been split only to enable labeling in its center.

**(C) SDS-PAGE of crystals containing A3<sup>OB</sup>-A6-A<sup>3</sup>Nb14.** The crystals were carefully washed before electrophoresis. Dissolved crystals are shown in lane 2. Purified A2<sup>OB</sup>-A3<sup>OB</sup>-A6 and A<sup>3</sup>Nb14 are shown in lanes 3 and 4, as controls. Proteins were stained with Coomassie. The numbers to the left of lane 1 indicate the molecular weights of standard proteins.

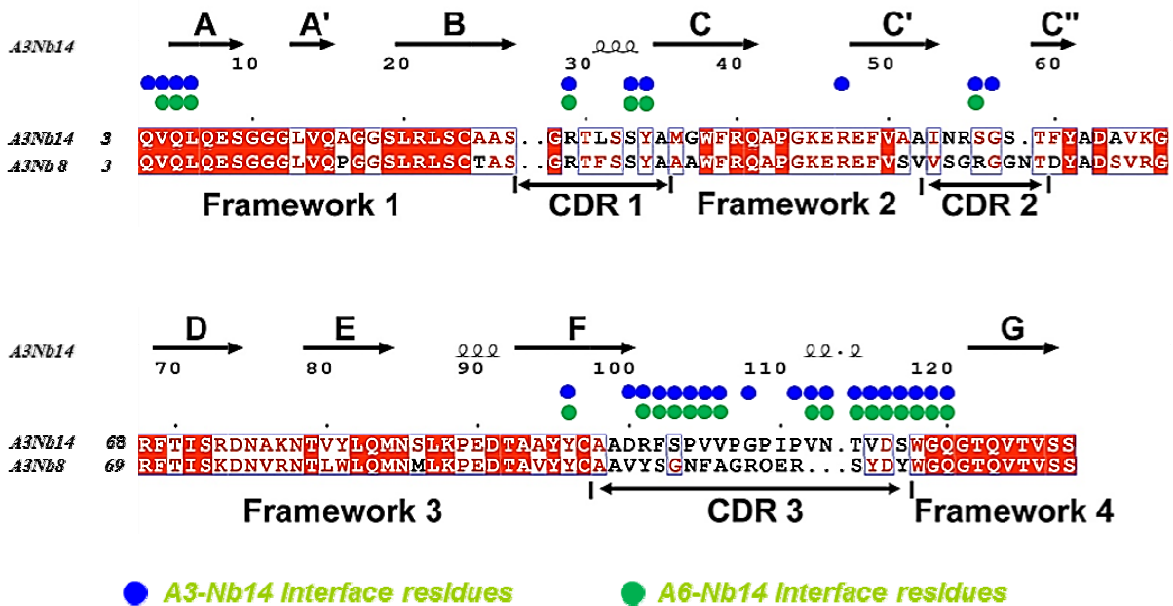

**Supplementary Figure S3. Sequence alignment of anti-A3 nanobodies <sup>A3</sup>Nb8 and <sup>A3</sup>Nb14.**

The secondary structure elements correspond to the crystal structure of <sup>A3</sup>Nb14. Since each A3 and A6 monomer interacts with <sup>A3</sup>Nb14, the residues contacting A3<sup>OB</sup> are labeled by blue circles, and residues contacting A6 by green circles. The three CDR's and framework regions of the nanobodies are indicated according to IMGT. (The double deletions after residue 113 derive from the fact that in the collection of 14 anti-A3 nanobodies obtained, several of these have a residue corresponding to this position).

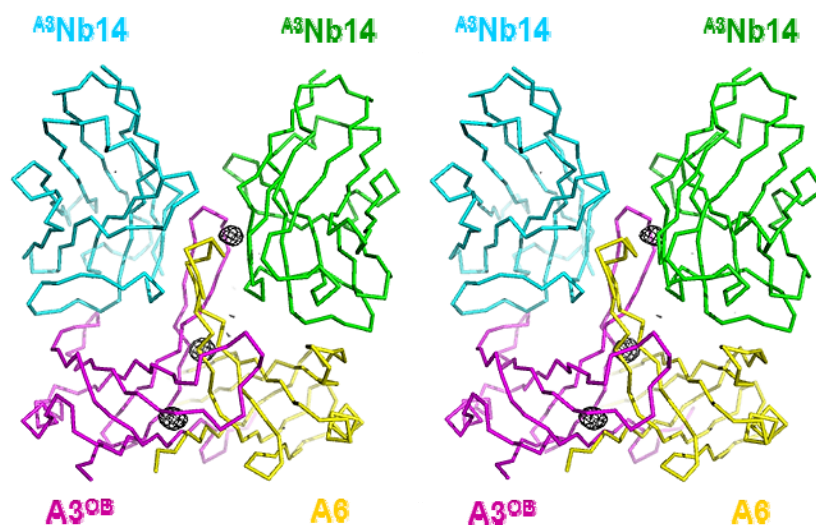

**Supplementary Figure S4. Electron densities of Selenomethionines of A3.** Stereo-view of the A3<sup>OB</sup>-A6-A<sup>3</sup>Nb14 complex and the anomalous difference map. The A3<sup>OB</sup>-A6-A<sup>3</sup>Nb14 heterotetrameric complex is shown as ribbons. The anomalous difference map calculated from the Se MAD data is shown in gray mesh as contoured at 4.0  $\sigma$ . The three sites observed all occur in one chain thereby unambiguously identifying that the two OB folds are different. Colors: A3<sup>OB</sup> magenta with its <sup>A3</sup>Nb14 bound in blue, A6 yellow with its <sup>A3</sup>Nb14 bound in green.



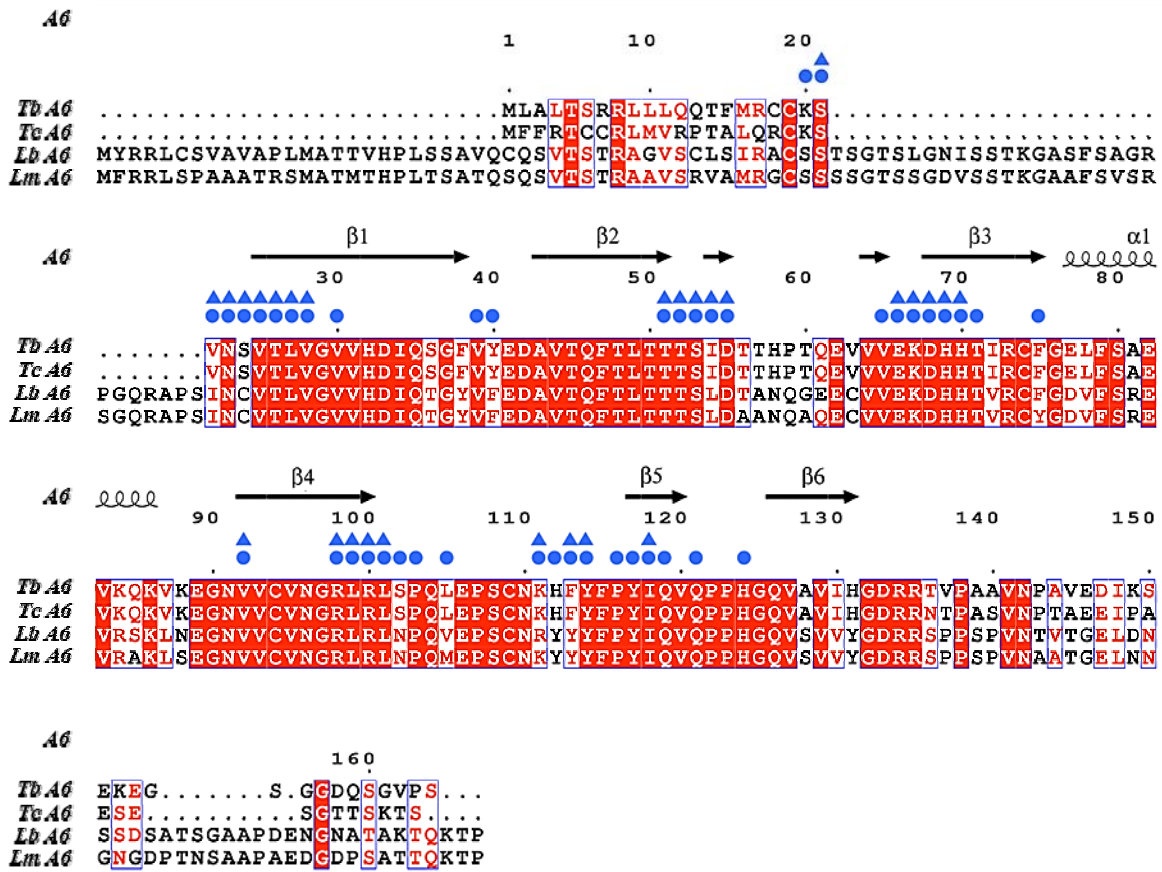

● **A3-A6 Interface residues in A3A6 antiA3Nb14 structure**  
▲ **A6-A6 Interface residues in A6 antiA6Nb15 structure**

**Supplementary Figure S6. Family sequence alignment of A6.** Trypanosomatid species shown are: Lm, *Leishmania major*; Lb, *Leishmania brasiliensis*; Tc, *Trypanosoma cruzi*; Tb, *Trypanosoma brucei*. The *T. brucei* A6 amino acids are numbered. The secondary structure elements correspond to the crystal structure of *T. brucei* A6. Strictly conserved residues are in the filled red boxes. Contact residues involved in A3<sup>OB</sup>-A6 heterodimer interface (current structure) and in the A6-A6 homodimer interface (PDB-ID: 3K7U)(10) are depicted by filled circles and triangles, respectively.



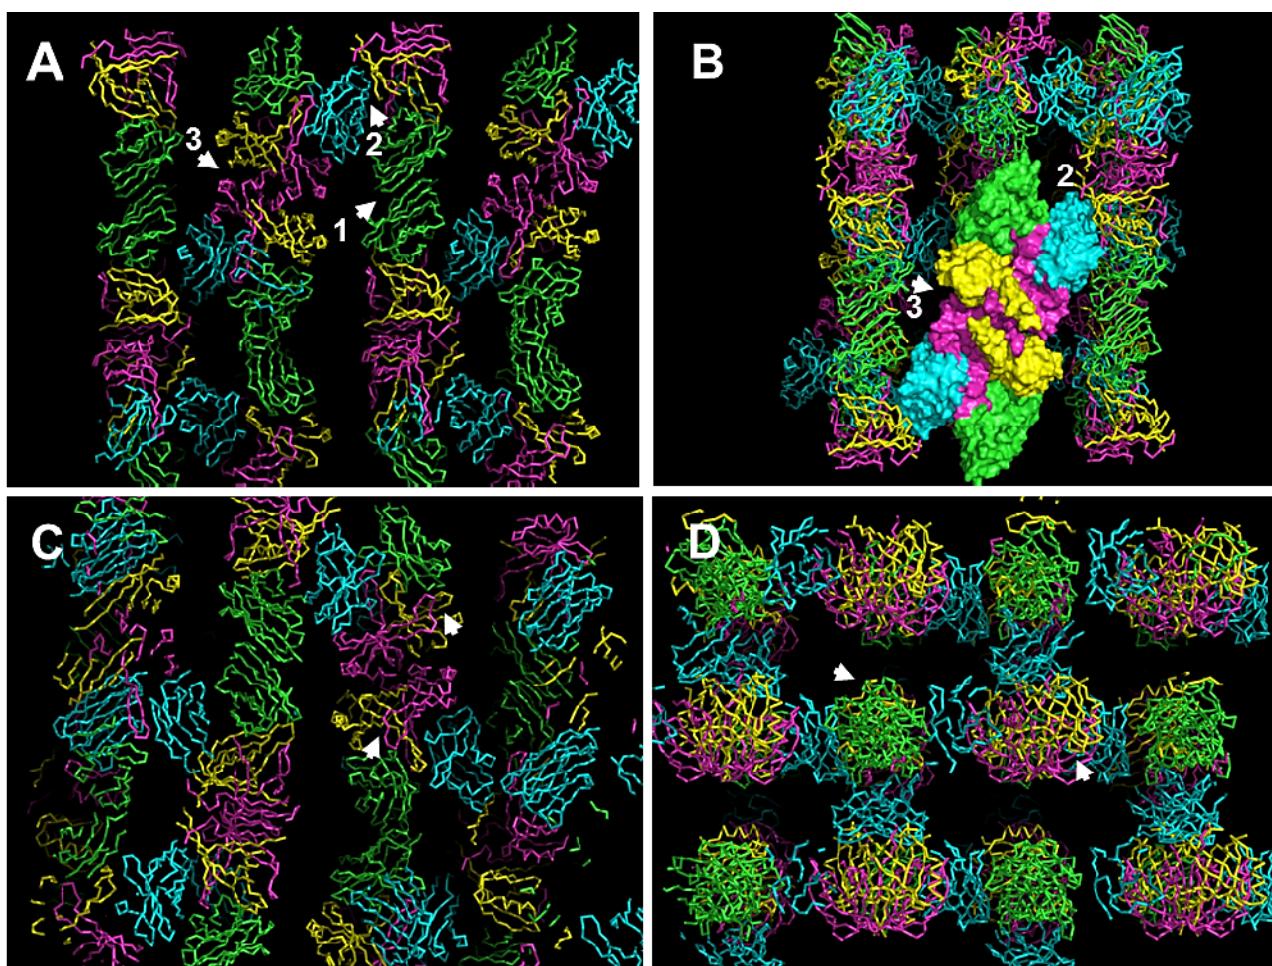

**Supplementary Figure S7. Lattice contacts in the  $A3^{OB}$ - $A6$ - $A^3Nb14$  crystals.** Crystal lattice contacts are mediated by both nanobodies and the  $A3^{OB}$ - $A6$  dimer. Colors:  $A3^{OB}$  magenta;  $A6$  yellow;  $A^3Nb14$  bound to  $A3^{OB}$  blue;  $A^3Nb14$  bound to  $A6$  green.

**(A and B).** First arrow: the most extensive pairwise nanobody-nanobody interactions occur when two anti-parallel strands of one nanobody form a four-stranded antiparallel  $\beta$ -sheet with the two equivalent  $\beta$ -strands from a neighboring nanobody. Second arrow: in this crystal contact an  $A^3Nb14$  nanobody engages three nanobodies of neighboring heterotetramers. Third arrow: important crystal contacts are made between the  $\beta$ -surfaces of two adjacent  $A3^{OB}$ - $A6$  dimers, burying  $2000 \text{ \AA}^2$  surface area, leading to an  $(A3^{OB}-A6)_2$  heterotetramer of four OB folds of two different chain types.

**(C and D)** The L23 loop positions of  $A3^{OB}$  and  $A6$  are indicated with arrows, showing that none of the L23 loops are engaged in crystal contacts.



**A**

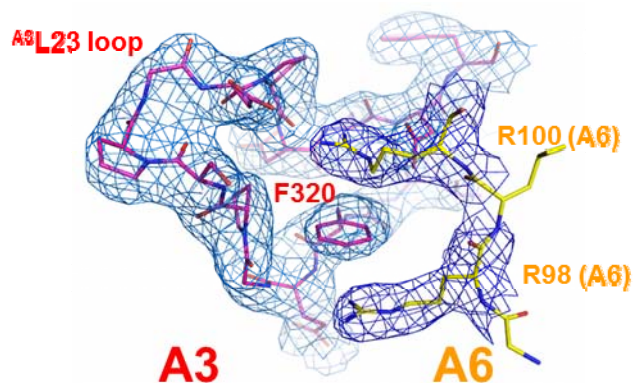

**B**

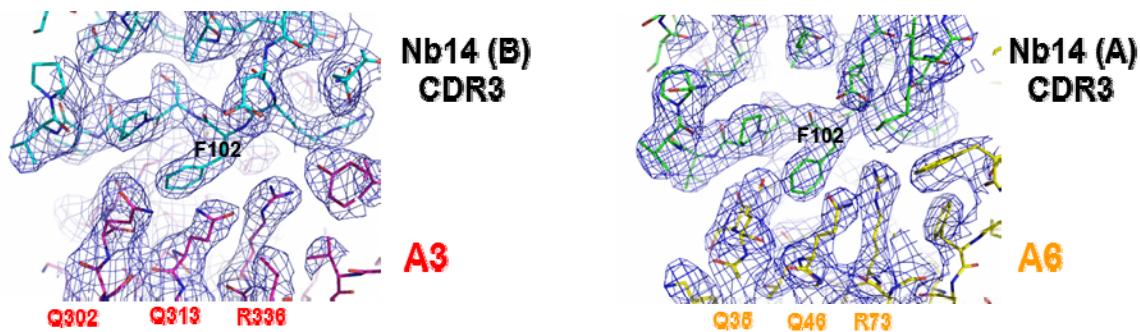

**Supplementary Figure S8. Electron density from the A3<sup>OB</sup>-A6-<sup>A3</sup>Nb14 complex.**

**(A) Electron density map of the A3<sup>OB</sup>-A6-<sup>A3</sup>Nb14 in a region at the dimer interface of A3 and A6.**

**(B) Electron density maps of the A3<sup>OB</sup>-A6-<sup>A3</sup>Nb14 in the vicinity of residue F102 at Interaction Region 1.** 2mF<sub>o</sub> - DF<sub>c</sub> electron density maps are shown as a blue mesh, contoured at 1  $\sigma$ . Selected residues from the A3, A6, and CDR3 are labeled.

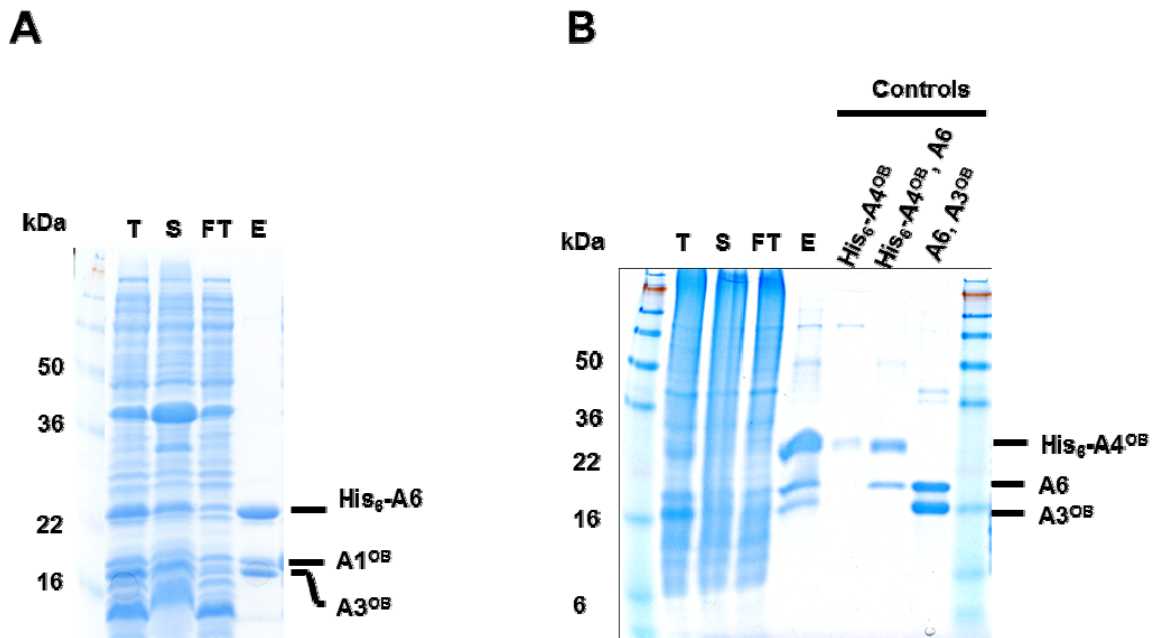

**Supplementary Figure S9. Formation of A1<sup>OB</sup>-A3<sup>OB</sup>-A6 and A4<sup>OB</sup>-A3<sup>OB</sup>-A6 ternary complexes.**

**(A) A1<sup>OB</sup>-A3<sup>OB</sup>-A6 ternary complex.** The gene encoding residues 20-164 of *T. brucei* A6, preceded by an N-terminal 6xHistidine tag, was cloned into a pRSF vector (Novagen). The gene encoding residues 626-762 of *T. brucei* A1 (A1<sup>OB</sup>) and the gene encoding residues 245-393 of *T. brucei* A3 (A3<sup>OB</sup>) were cloned into the bi-cistronic expression vector pACYC (Novagen) without His-tag. His<sub>6</sub>A6, A1<sup>OB</sup> and A3<sup>OB</sup> are co-expressed in *E. coli* and co-purified by Ni-NTA chromatography via an N-terminal His<sub>6</sub>-tagged A6.

**(B) A4<sup>OB</sup>-A3<sup>OB</sup>-A6 ternary complex.** The gene encoding residues 34-218 of *T. brucei* A4 (A4<sup>OB</sup>), preceded by an N-terminal 6xHistidine tag, was cloned into a pRSF vector. The gene encoding residues 20-164 of *T. brucei* A6 and the gene encoding residues 245-393 of *T. brucei* A3 (A3<sup>OB</sup>) were cloned into the bi-cistronic expression vector pACYC without His-tag. His<sub>6</sub>A4<sup>OB</sup>, A3<sup>OB</sup> and A6 are co-expressed in *E. coli* and co-purified by Ni-NTA chromatography via an N-terminal His<sub>6</sub>-tagged A4<sup>OB</sup>. The soluble lysates were applied to a Ni-NTA column, washed with 20 mM imidazole and subsequently eluted with 250 mM imidazole. Proteins were analyzed on 8-16% SDS-PAGE gel and stained with Coomassie. Molecular weight markers are indicated on the left. T: total lysate; S: soluble fraction; FT: flow-through Ni-NTA; E: Ni-NTA elution fraction.

## SUPPLEMENTARY TABLES

Supplementary Table S1. A6 residues interacting with A3<sup>OB</sup> and A6

| A6    | A3 residue (A3 <sup>OB</sup> -A6 dimer) <sup>a</sup> |                               |                              |                            |                                         | A6    | A6 residue (A6-A6 dimer) <sup>b</sup> |                            |                                    |                |                              |
|-------|------------------------------------------------------|-------------------------------|------------------------------|----------------------------|-----------------------------------------|-------|---------------------------------------|----------------------------|------------------------------------|----------------|------------------------------|
|       | BSA (Å <sup>2</sup> )                                | M-M                           | S-S                          | M-S                        | S-M                                     |       | BSA (Å <sup>2</sup> )                 | M-M                        | S-S                                | M-S            | S-M                          |
| Lys20 | 30                                                   |                               |                              | Leu295<br>Trp355           |                                         | Lys20 |                                       |                            |                                    |                |                              |
| Ser21 | 88                                                   | Leu295                        | Thr318<br>Asp319<br>Trp355   | Leu295<br>Trp355           | Leu295<br>Gly296<br>Thr318<br>Asp319(H) | Ser21 |                                       |                            |                                    |                |                              |
| Val22 | 74                                                   | Val293<br>Met294<br>Leu295(H) | Val293<br>Leu295             | Met294<br>Leu295<br>Thr318 | Val293<br>Met294<br>Leu295              | Val22 | 112                                   | Thr26<br>Leu27<br>Val28(H) | Ser53                              | Leu27<br>Thr51 | Val28<br>Thr52               |
| Asn23 | 57                                                   |                               | Met294<br>Thr318<br>His333   | Met294                     |                                         | Asn23 | 43                                    | Thr26                      | Leu27<br>Thr51<br>His70            | Leu27          |                              |
| Ser24 | 48                                                   | Cys292<br>Val293(H)           | Val293                       | Cys292<br>Val293<br>Met294 | Val293                                  | Ser24 | 45                                    | Val25<br>Thr26(H)          | Thr26                              | Val25          | Thr26                        |
| Val25 | 38                                                   | His291                        | Cys292<br>Met294<br>Leu362   |                            | His291                                  | Val25 | 32                                    | Ser24                      | Val25                              |                | Ser24                        |
| Thr26 | 45                                                   | Val289<br>Asn290<br>His291(H) | His291                       | His291                     |                                         | Thr26 | 39                                    | Val22<br>Asn23<br>Ser24(H) | Ser24                              | Ser24          |                              |
| Leu27 | 25                                                   | Val289                        | Asn290<br>Leu362             |                            |                                         | Leu27 | 23                                    | Val22                      | Asn23                              | Asn23          | Val22                        |
| Val28 | 55                                                   | Val289(H)                     | Val289                       | Val289                     | Cys288                                  | Val28 |                                       | Val22(H)                   |                                    | Val22          |                              |
| Val30 | 15                                                   |                               | Ala283                       |                            |                                         | Val30 |                                       |                            |                                    |                |                              |
| Val39 | 4                                                    |                               | Ser324                       |                            |                                         | Val39 |                                       |                            |                                    |                |                              |
| Tyr40 | 66                                                   |                               | Ser324<br>Pro325             |                            |                                         | Tyr40 |                                       |                            |                                    |                |                              |
| Thr51 | 20                                                   |                               | Val289<br>Asn290             |                            | Val289                                  | Thr51 | 20                                    |                            | Asn23                              |                | Val22                        |
| Thr52 | 21                                                   |                               |                              | Val289                     |                                         | Thr52 | 16                                    |                            |                                    | Val22          |                              |
| Ser53 | 32                                                   |                               | Val289                       | Val289                     |                                         | Ser53 | 40                                    |                            | Val22<br>Arg98                     | Val22          |                              |
| Asp55 | 15                                                   |                               | Arg361                       |                            |                                         | Asp55 |                                       |                            |                                    |                |                              |
| Glu66 | 75                                                   |                               | Arg361(H.SB)<br>Arg363(H.SB) |                            |                                         | Glu66 | 70                                    |                            | Arg98(SB)<br>Arg100(SB)            |                |                              |
| Lys67 | 2                                                    | Arg363                        |                              |                            |                                         | Lys67 | 5                                     |                            |                                    | Arg100         |                              |
| Asp68 | 68                                                   |                               | Arg363(H.SB)<br>Met364       |                            | Leu362<br>Arg363<br>Met364              | Asp68 | 62                                    |                            | Leu99<br>Arg100(H.SB)<br>Leu101(H) |                | Leu99<br>Arg100(H)<br>Leu101 |
| His69 | 31                                                   |                               |                              | Met364                     |                                         | His69 | 17                                    |                            |                                    | Leu101         |                              |
| His70 | 43                                                   |                               | Leu362<br>Met364             |                            | Leu362                                  | His70 | 46                                    |                            | Asn23<br>Leu99                     | Leu101         | Leu99                        |
| Val92 | 10                                                   |                               | Ala283                       |                            |                                         | Val92 |                                       |                            |                                    |                |                              |
| Arg98 | 60                                                   |                               | Phe320<br>Glu321             |                            | Glu321<br>Gly322                        | Arg98 | 39                                    |                            | Ser53<br>Glu66(SB)                 |                |                              |
| Leu99 | 61                                                   |                               | His333<br>Leu362<br>Pro379   | Asp331<br>His333           |                                         | Leu99 | 79                                    |                            | His70                              | Asp68<br>His70 |                              |

| A6     | A3 residue (A3 <sup>OB</sup> -A6 dimer) <sup>a</sup> |     |                                            |                  |                                   | A6     | A6 residue (A6-A6 dimer) <sup>b</sup> |     |                              |        |                |
|--------|------------------------------------------------------|-----|--------------------------------------------|------------------|-----------------------------------|--------|---------------------------------------|-----|------------------------------|--------|----------------|
|        | BSA (Å <sup>2</sup> )                                | M-M | S-S                                        | M-S              | S-M                               |        | BSA (Å <sup>2</sup> )                 | M-M | S-S                          | M-S    | S-M            |
| Arg100 | 132                                                  |     | Phe320<br>Pro323<br>Asp331(H.SB)<br>Asp327 | Asp331           | Pro323<br><br>Pro328(H)<br>Lys330 | Arg100 | 56                                    |     | Glu66(SB)<br><br>Asp68(H.SB) | Asp68  | Lys67          |
| Leu101 | 74                                                   |     | Asp331<br><br>His333<br>Pro379             | Asp331           | Phe332                            | Leu101 | 84                                    |     | Asp68(H)<br><br>Pro116       | Asp68  | His69<br>His70 |
| Pro103 | 14                                                   |     | Pro328                                     |                  |                                   | Pro103 |                                       |     |                              |        |                |
| Leu105 | 58                                                   |     | Pro328                                     |                  | Gly326                            | Leu105 |                                       |     |                              |        |                |
| Lys111 | 14                                                   |     | Tyr376                                     |                  |                                   | Lys111 |                                       |     |                              |        |                |
| His112 | 24                                                   |     | Asp369(SB)                                 |                  |                                   | His112 |                                       |     |                              |        |                |
| Phe113 | 116                                                  |     | Gln367<br>Asp369<br>Tyr376                 |                  |                                   | Phe113 |                                       |     |                              |        |                |
| Tyr114 | 58                                                   |     | Tyr378<br>Pro379                           |                  | His377                            | Tyr114 |                                       |     |                              |        |                |
| Phe115 |                                                      |     |                                            |                  |                                   | Phe115 | 36                                    |     | Phe115                       |        |                |
| Pro116 | 54                                                   |     | Pro379<br>Met364                           | Pro379<br>Met364 | His377<br>Pro379                  | Pro116 | 60                                    |     | Pro116<br>Leu101             | Pro116 |                |
| Tyr117 | 10                                                   |     | Asp327                                     |                  |                                   | Tyr117 |                                       |     |                              |        |                |
| Gln119 | 22                                                   |     | Phe320                                     |                  |                                   | Gln119 |                                       |     |                              |        |                |
| His124 | 18                                                   |     | Glu321                                     |                  |                                   | His124 |                                       |     |                              |        |                |

**BSA:** Buried surface area according to Pisa (11), **M-M:** Main chain - Main chain interactions; **S-S:** Side chain - Side chain interactions; **M-S:** Main chain - Side chain interactions; **S-M:** Side chain and Main chain interactions. **H:** Hydrogen bond; **SB:** Salt Bridge.

a: The interface residues in the A3<sup>OB</sup>-A6 heterodimer structure (Current structure)

b: The interface residues in the A6 homodimer structure (PDB-ID: 3K7U)(10)

**Supplementary Table S2. A3 residues interacting with A6 in the A3<sup>OB</sup>-A6 heterodimer.**

| A3            | A6 residue (A3 <sup>OB</sup> -A6 dimer) <sup>a</sup> |                                     |                                  |                           |                                  |
|---------------|------------------------------------------------------|-------------------------------------|----------------------------------|---------------------------|----------------------------------|
|               | BSA (Å <sup>2</sup> )                                | M-M                                 | S-S                              | M-S                       | S-M                              |
| <b>Ala283</b> | 27                                                   |                                     | Val30                            |                           |                                  |
| <b>His285</b> | 33                                                   |                                     | Ile54                            |                           |                                  |
| <b>Cys288</b> | 16                                                   |                                     | Val28                            | Thr26                     |                                  |
| <b>Val289</b> | 101                                                  | Thr26<br>Leu27<br>Val28(H)          | Val28<br>Thr51<br>Ser53          | Leu27<br>Val28<br>Thr51   | Val28<br>Thr52                   |
| <b>Asn290</b> | 43                                                   | Thr26<br>Leu27<br>Val28             | Leu27<br>Thr51<br>Asp68<br>His70 | Leu27                     | Thr26                            |
| <b>His291</b> | 42                                                   | Ser24<br>Val25<br>Thr26(H)<br>Leu27 | Thr26                            | Thr26<br>Leu27            |                                  |
| <b>Cys292</b> | 20                                                   | Ser24<br>Val25<br>Thr26             | Val25                            | Ser24                     | Ser24<br>Val25<br>Thr26          |
| <b>Val293</b> | 42                                                   | Val22<br>Asn23<br>Ser24(H)          | Val22<br>Ser24                   | Ser24                     | Ser24                            |
| <b>Met294</b> | 46                                                   | Val22<br>Asn23<br>Ser24             | Asn23<br>Val25                   | Val22                     | Val22<br>Asn23<br>Ser24<br>Val25 |
| <b>Leu295</b> | 48                                                   | Ser21<br>Val22(H)<br>Asn23          | Ser21<br>Val22                   | Ser21<br>Val22            | Lys20<br>Ser21<br>Val22          |
| <b>Gly296</b> | 1                                                    | Ser21                               |                                  | Ser21                     |                                  |
| <b>Ile317</b> | 1                                                    |                                     |                                  | Ser21                     |                                  |
| <b>Thr318</b> | 21                                                   |                                     | Ser21<br>Asn23                   | Ser21                     | Val22                            |
| <b>Asp319</b> | 25                                                   |                                     | Ser21                            | Ser21(H)<br>Asn23         |                                  |
| <b>Phe320</b> | 100                                                  |                                     | Arg98<br>Arg100<br>Gln119        | Arg98                     |                                  |
| <b>Glu321</b> | 40                                                   |                                     | Arg98<br>His124                  | Arg98                     |                                  |
| <b>Gly322</b> | 18                                                   |                                     |                                  | Arg98<br>Gln119<br>Gln121 |                                  |
| <b>Pro323</b> | 3                                                    |                                     | Arg100                           | Arg100                    |                                  |
| <b>Ser324</b> | 43                                                   |                                     | Val39<br>Tyr40<br>Phe75          | Tyr40                     |                                  |
| <b>Pro325</b> | 27                                                   |                                     | Tyr40                            | Tyr40                     |                                  |
| <b>Gly326</b> | 34                                                   |                                     |                                  | Leu105                    |                                  |

| A3     | A6 residue (A3 <sup>OB</sup> -A6 dimer) <sup>a</sup> |        |                                            |                            |                                        |
|--------|------------------------------------------------------|--------|--------------------------------------------|----------------------------|----------------------------------------|
|        | BSA (Å <sup>2</sup> )                                | M-M    | S-S                                        | M-S                        | S-M                                    |
| Asp327 | 37                                                   |        | Tyr40<br>Arg100<br>Leu105<br>Tyr117        | Leu105                     |                                        |
| Pro328 | 45                                                   |        | Arg100<br>Leu105                           | Arg100(H)<br>Leu105        |                                        |
| Lys330 | 4                                                    |        |                                            | Arg100(H)                  |                                        |
| Asp331 | 52                                                   |        | Asn23<br>Arg100<br>Leu101                  | Leu101                     | Leu99<br>Arg100(H)<br>Leu101<br>Ser102 |
| Phe332 | 30                                                   | Tyr114 |                                            | Leu101<br>Tyr114           |                                        |
| His333 | 46                                                   |        | Asn23<br>Leu99<br>Leu101                   | Leu101                     | Leu99                                  |
| Trp355 | 31                                                   |        | Lys20<br>Ser21                             |                            | Lys20<br>Ser21                         |
| Leu357 | 1                                                    |        | Val22                                      |                            |                                        |
| Arg361 | 52                                                   |        | Ser53<br>Asp55<br>Glu66                    |                            |                                        |
| Leu362 | 75                                                   |        | Val25<br>Leu27<br>His70<br>Leu99<br>Ile118 | Asp68<br>His70             |                                        |
| Arg363 | 70                                                   |        | Glu66<br>Asp68(H)                          | Asp68                      | Val65<br>Glu66<br>Lys67<br>Asp68       |
| Met364 | 79                                                   |        | Asp68<br>His69<br>His70<br>Pro116          | Asp68                      | His69                                  |
| Gln367 | 28                                                   |        | Phe113                                     |                            |                                        |
| Tyr368 | 4                                                    |        |                                            | Phe113                     |                                        |
| Asp369 | 33                                                   |        | Phe113<br>His112                           | Phe113                     |                                        |
| Tyr376 | 58                                                   |        | Lys111<br>Phe113                           | Lys111                     | Lys111<br>Tyr114                       |
| His377 | 28                                                   | Tyr114 |                                            | Tyr114<br>Pro116           |                                        |
| Tyr378 | 21                                                   |        | Tyr114                                     | Tyr114<br>Pro116           |                                        |
| Pro379 | 69                                                   |        | Leu99<br>Leu101<br>Tyr114<br>Pro116        | Tyr114<br>Leu101<br>Pro116 | Pro116                                 |
| Gln382 | 4                                                    |        | Glu66                                      |                            |                                        |

**BSA**: Buried surface area according to Pisa (11), **M-M**: Main chain - Main chain interactions; **S-S**: Side chain - Side chain interactions; **M-S**: Main chain - Side chain interactions; **S-M**: Side chain and Main chain interactions. **H**: Hydrogen bond; **SB**: Salt Bridge.

a: The interface residues in the A3<sup>OB</sup>-A6 heterodimer structure (Current structure)



**Supplementary Table S3. A. <sup>A3</sup>Nb14 residues interacting with A3 and A6 in the A3<sup>OB</sup>- A6 - (<sup>A3</sup>Nb14)<sub>2</sub> heterotetramer.**

| Nb14          | A3 residue (A3 <sup>OB</sup> -A6 dimer) <sup>a</sup> |                        |                                                                    |                     |                                                | Nb14          | A6 residue (A3 <sup>OB</sup> -A6 dimer) <sup>a</sup> |                   |                                                    |                  |                                  |
|---------------|------------------------------------------------------|------------------------|--------------------------------------------------------------------|---------------------|------------------------------------------------|---------------|------------------------------------------------------|-------------------|----------------------------------------------------|------------------|----------------------------------|
|               | BSA (Å <sup>2</sup> )                                | M-M                    | S-S                                                                | M-S                 | S-M                                            |               | BSA (Å <sup>2</sup> )                                | M-M               | S-S                                                | M-S              | S-M                              |
| <b>Gln3</b>   | 49                                                   |                        | Pro366<br>Tyr368                                                   |                     | Pro366<br>Gln367<br>Tyr368<br>Try375           | <b>Gln3</b>   |                                                      |                   |                                                    |                  |                                  |
| <b>Val4</b>   | 3                                                    |                        |                                                                    | Tyr368              |                                                | <b>Val4</b>   | 49                                                   | Ser108<br>Cys109  |                                                    | Glu106<br>Cys109 |                                  |
| <b>Gln5</b>   | 49                                                   |                        | Tyr368                                                             |                     | Tyr368                                         | <b>Gln5</b>   | 28                                                   | Ser108            | Ser108                                             | Ser108           | Ser108                           |
| <b>Arg29</b>  | 33                                                   |                        | Phe307                                                             |                     |                                                | <b>Arg29</b>  | 46                                                   |                   | Glu106(SB)<br>Leu105<br>Tyr40                      |                  | Tyr40                            |
| <b>Ser33</b>  | 20                                                   |                        | Phe307                                                             | Phe307              | Phe307                                         | <b>Ser33</b>  | 25                                                   | Val39             | Tyr40                                              |                  |                                  |
| <b>Tyr34</b>  | 9                                                    |                        | Phe307                                                             |                     |                                                | <b>Tyr34</b>  | 11                                                   |                   | Tyr40                                              |                  | Tyr40                            |
| <b>Arg55</b>  | 64                                                   |                        | Phe307<br>Glu308(SB)                                               |                     | Val306<br>Phe307(H)<br>Glu308                  | <b>Arg55</b>  | 60                                                   |                   | Phe38<br>Glu41                                     |                  | Tyr40(H)                         |
| <b>Arg101</b> | 128                                                  | Phe307<br>Val365       | Val306<br>Phe307<br>Arg336<br>Pro366<br>Val365<br>Tyr378           | Phe305<br>Val306    |                                                | <b>Arg101</b> | 124                                                  | Phe38<br>Val39(H) | Val39<br>Tyr40<br>Arg73<br>Tyr117                  | Val39            | Tyr40                            |
| <b>Phe102</b> | 140                                                  | Phe305                 | Gln302<br>Gly304<br>Val306<br>Phe307<br>Val311<br>Gln313<br>Arg336 | Val306              | Gln302<br>Glu303<br>Gly304<br>Phe305<br>Gln313 | <b>Phe102</b> | 125                                                  | Phe38             | Gln35<br>Ser36<br>Val39<br>Val44<br>Gln46<br>Arg73 | Val39            | Ser36<br>Gly37<br>Val44<br>Gln46 |
| <b>Ser103</b> | 29                                                   | Gly304<br>Phe305(H)    |                                                                    | Phe305              | Phe305                                         | <b>Ser103</b> | 32                                                   | Gly37<br>Phe38(H) |                                                    | Phe38            | Phe38                            |
| <b>Pro104</b> | 18                                                   | Glu303<br>Gly304       | Gln302                                                             |                     | Glu303                                         | <b>Pro104</b> | 16                                                   | Ser36<br>Gly37    | Gln35                                              |                  | Ser36                            |
| <b>Val105</b> | 63                                                   | Glu303(H)<br>Gly304    | Glu303<br>Phe305                                                   |                     | Gly304                                         | <b>Val105</b> | 58                                                   | Ser36(H)<br>Gly37 | Ser36<br>Phe38                                     |                  | Ser36                            |
| <b>Asn113</b> | 24                                                   |                        |                                                                    | Gln367(H)<br>Tyr378 |                                                | <b>Asn113</b> | 52                                                   |                   |                                                    | Lys111<br>Phe115 |                                  |
| <b>Thr114</b> | 68                                                   |                        | Thr334<br>Tyr378                                                   | Gln367<br>Tyr378    |                                                | <b>Thr114</b> | 40                                                   |                   | Arg73<br>Phe115                                    |                  |                                  |
| <b>Val115</b> | 19                                                   |                        |                                                                    | Gln367(H)           |                                                | <b>Val115</b> | 19                                                   |                   |                                                    | Lys111           |                                  |
| <b>Asp116</b> | 29                                                   | Pro366<br>Tyr368(H)    | Try368                                                             | Gln367              | Pro366<br>Tyr378                               | <b>Asp116</b> | 31                                                   | Cys109            |                                                    | Cys109<br>Lys111 |                                  |
| <b>Ser117</b> | 16                                                   | Tyr368                 | Try368                                                             | Tyr368              | Try368                                         | <b>Ser117</b> | 14                                                   | Cys109            | Cys109                                             | Cys109           | Cys109                           |
| <b>Trp118</b> | 56                                                   | Tyr368(H)<br>Gly370(H) | Asp369                                                             |                     | Tyr368<br>Asp369<br>Gly370                     | <b>Trp118</b> | 63                                                   | Cys109(H)         | Cys109<br>Asn110<br>Lys111                         | Asn110           | Asn110                           |
| <b>Gly119</b> | 9                                                    | Gly370                 |                                                                    |                     |                                                | <b>Gly119</b> | 6                                                    |                   |                                                    | Ans110           |                                  |
| <b>Gln120</b> | 48                                                   | Gly370<br>Ser371       |                                                                    | Ser371              |                                                | <b>Gln120</b> |                                                      |                   |                                                    |                  |                                  |

**B. A3 and A6 residues interacting with  $A^3Nb14$  residues in the  $A3^{OB}$ -A6-( $A^3Nb14$ )<sub>2</sub> heterotetramer.**

| $A3^{OB}$     | $A^3Nb14$             |                                         |                                             |                                     |                                            | $A6$          | $A^3Nb14$             |                                         |                                      |                                             |                                                |
|---------------|-----------------------|-----------------------------------------|---------------------------------------------|-------------------------------------|--------------------------------------------|---------------|-----------------------|-----------------------------------------|--------------------------------------|---------------------------------------------|------------------------------------------------|
|               | BSA (Å <sup>2</sup> ) | M-M                                     | S-S                                         | M-S                                 | S-M                                        |               | BSA (Å <sup>2</sup> ) | M-M                                     | S-S                                  | M-S                                         | S-M                                            |
| <b>Gln302</b> | 39                    |                                         | Phe102<br>Pro104<br>Val106                  | Phe102                              | Pro104<br>Val106                           | <b>Gln35</b>  | 30                    |                                         | Phe102                               | Phe102                                      |                                                |
| <b>Glu303</b> | 41                    | Ser103<br>Pro104<br>Val105<br>Val106    | Val105                                      | Phe102<br>Pro104<br>Val105          |                                            | <b>Ser36</b>  | 50                    | Ser103<br>Pro104<br>Val105<br>Val106    | Phe102<br>Val105                     | Phe102<br>Val105                            |                                                |
| <b>Gly304</b> | 26                    | Ser103<br>Pro104<br>Val105              |                                             | Phe102<br>Val105                    |                                            | <b>Gly37</b>  | 28                    | Ser103<br>Pro104<br>Val105              |                                      | Phe102<br>Val105                            |                                                |
| <b>Phe305</b> | 74                    | Arg101<br>Phe102<br>Ser103(H)<br>Pro104 | Arg55<br>Ser103<br>Val105                   | Arg55<br>Arg101<br>Phe102<br>Ser103 | Ser103                                     | <b>Phe38</b>  | 70                    | Arg101<br>Phe102<br>Ser103(H)<br>Pro104 | Ser103<br>Val105                     | Phe102<br>Ser103                            | Ser103                                         |
| <b>Val306</b> | 29                    | Arg101<br>Phe102                        | Arg101<br>Phe102                            | Arg55<br>Arg101<br>Phe102           | Arg101<br>Phe102                           | <b>Val39</b>  | 49                    | Ser33<br>Arg101(H)<br>Phe102            | Phe102                               | Arg101                                      | Arg101<br>Phe102                               |
| <b>Phe307</b> | 157                   | Ser33<br>Arg55<br>Arg101                | Arg29<br>Ser33<br>Tyr34<br>Arg101<br>Asp106 | Ser33<br>Arg55(H)                   | Ser33<br>Tyr34<br>Arg101                   | <b>Tyr40</b>  | 118                   | Ser33<br>Arg101                         | Ser33<br>Tyr34<br>Arg101             | Arg29<br>Ser33<br>Tyr34<br>Arg101<br>Asp106 | Ser33<br>Arg101                                |
| <b>Glu308</b> | 15                    |                                         | Ser33<br>Arg55                              | Arg55                               |                                            | <b>Val44</b>  | 6                     |                                         | Phe102                               | Phe102                                      |                                                |
| <b>Val311</b> | 5                     |                                         | Phe102                                      | Phe102                              |                                            | <b>Gln46</b>  | 27                    |                                         | Phe102                               | Phe102                                      |                                                |
| <b>Gln313</b> | 30                    |                                         | Phe102                                      | Phe102                              |                                            | <b>Arg73</b>  | 52                    |                                         | Asp100<br>Arg101<br>Phe102<br>Thr114 |                                             | Phe102                                         |
| <b>Thr334</b> | 16                    |                                         | Thr114                                      |                                     |                                            | <b>Leu105</b> | 47                    |                                         | Val4<br>Arg29                        |                                             |                                                |
| <b>Arg336</b> | 31                    |                                         | Asp100<br>Arg101<br>Phe102                  |                                     | Phe102                                     | <b>Glu106</b> | 23                    |                                         | Val4<br>Arg29                        |                                             |                                                |
| <b>Val365</b> | 36                    |                                         | Arg101<br>Asp116                            |                                     |                                            | <b>Ser108</b> | 55                    | Val4<br>Gln5<br>Leu 6<br>Trp118         | Gln5                                 | Gln5<br>Ser117                              | Val4<br>Gln5                                   |
| <b>Pro366</b> | 40                    | Asp116                                  | Arg101                                      | Gln3<br>Arg101<br>Asp116            |                                            | <b>Cys109</b> | 59                    | Val4<br>Asp116<br>Ser117<br>Trp118(H)   | Val4<br>Ser117                       | Val4<br>Ser117<br>Trp118                    | Val4<br>Asp116<br>Ser117                       |
| <b>Gln367</b> | 57                    | Val115<br>Asp116                        | Val115                                      | Gln3                                | Asn113<br>Thr114<br>Val115(H)<br>Asp116    | <b>Asn110</b> | 69                    | Trp118                                  | Trp118<br>Gln120                     | Trp118                                      | Trp118<br>Gly119<br>Gln120                     |
| <b>Tyr368</b> | 103                   | Asp116<br>Ser117<br>Trp118(H)           | Gln3<br>Gln5<br>Ser117                      | Gln3<br>Gln5<br>Ser117<br>Trp118    | Val4<br>Gln5<br>Asp116<br>Ser117<br>Trp118 | <b>Lys111</b> | 78                    |                                         | Val115<br>Trp118                     |                                             | Val112<br>Asn113<br>Val115<br>Asp116<br>Ser117 |
| <b>Asp369</b> | 23                    | Trp118                                  | Trp118                                      | Trp118                              |                                            | <b>Tyr114</b> | 5                     | Asn113                                  |                                      |                                             |                                                |

| A3 <sup>OB</sup> | A3 <sup>Nb14</sup>    |                            |                            |                                      |                                      | A6     | A3 <sup>Nb14</sup>    |        |                  |     |                  |
|------------------|-----------------------|----------------------------|----------------------------|--------------------------------------|--------------------------------------|--------|-----------------------|--------|------------------|-----|------------------|
|                  | BSA (Å <sup>2</sup> ) | M-M                        | S-S                        | M-S                                  | S-M                                  |        | BSA (Å <sup>2</sup> ) | M-M    | S-S              | M-S | S-M              |
| Gly370           | 45                    | Trp118<br>Gly119<br>Gln120 |                            | Trp118<br>Gln120                     |                                      | Phe115 | 53                    | Asn113 | Asn113<br>Thr114 |     | Asn113<br>Thr114 |
| Ser371           | 37                    | Trp118<br>Gly119<br>Gln120 | Gln120                     | Gln120                               | Gly119<br>Gln120                     |        |                       |        |                  |     |                  |
| Arg373           | 21                    |                            | Gln120                     |                                      |                                      |        |                       |        |                  |     |                  |
| Tyr375           | 15                    |                            | Gln3                       | Gln5                                 |                                      |        |                       |        |                  |     |                  |
| Tyr378           | 61                    | Thr114                     | Arg101<br>Thr114<br>Asp116 | Asp100<br>Arg101<br>Thr114<br>Asp116 | Asn113<br>Thr114<br>Val115<br>Asp116 |        |                       |        |                  |     |                  |

**BSA:** Buried surface area according to Pisa (11), **M-M:** Main chain - Main chain interactions; **S-S:** Side chain - Side chain interactions; **M-S:** Main chain - Side chain interactions; **S-M:** Side chain and Main chain interactions. **H:** Hydrogen bond; **SB:** Salt Bridge.

a: The interface residues in the A3<sup>OB</sup>-A6 heterodimer structure (Current structure)

## SUPPLEMENTARY REFERENCES

*Note: Reference numbers 1-11 are those in the supplement. MT is the reference number of the same reference listed in the main text.*

- 1.<sup>(MT51)</sup> Schnauffer, A., Wu, M., Park, Y.J., Nakai, T., Deng, J., Proff, R., Hol, W.G. and Stuart, K.D. (2010) A protein-protein interaction map of trypanosome ~20S editosomes. *J Biol Chem*, 285, 5282-5295.
- 2.<sup>(MT89)</sup> Ernst, N.L., Panicucci, B., Carnes, J. and Stuart, K. (2009) Differential functions of two editosome exoUases in *Trypanosoma brucei*. *RNA*, 15, 947-957.
- 3.<sup>(MT20)</sup> Stuart, K.D., Schnauffer, A., Ernst, N.L. and Panigrahi, A.K. (2005) Complex management: RNA editing in trypanosomes. *Trends Biochem Sci*, 30, 97-105.
- 4.<sup>(MT36)</sup> Worthey, E.A., Schnauffer, A., Mian, I.S., Stuart, K. and Salavati, R. (2003) Comparative analysis of editosome proteins in trypanosomatids. *Nucleic Acids Res*, 31, 6392-6408.
- 5.<sup>(MT25)</sup> Aphasizhev, R., Aphasizheva, I., Nelson, R.E., Gao, G., Simpson, A.M., Kang, X., Falick, A.M., Sbicego, S. and Simpson, L. (2003) Isolation of a U-insertion/deletion editing complex from *Leishmania tarentolae* mitochondria. *EMBO J*, 22, 913-924.
- 6.<sup>(MT90)</sup> Huang, C.E., Cruz-Reyes, J., Zhelonkina, A.G., O'Hearn, S., Wirtz, E. and Sollner-Webb, B. (2001) Roles for ligases in the RNA editing complex of *Trypanosoma brucei*: band IV is needed for U-deletion and RNA repair. *EMBO J*, 20, 4694-4703.
- 7.<sup>(MT91)</sup> Simpson, L., Aphasizhev, R., Lukes, J. and Cruz-Reyes, J. Guide to the nomenclature of kinetoplastid RNA editing: a proposal. *Protist*, 161, 2-6.
- 8.<sup>(MT17)</sup> Deng, J., Ernst, N.L., Turley, S., Stuart, K.D. and Hol, W.G. (2005) Structural basis for UTP specificity of RNA editing TUTases from *Trypanosoma brucei*. *EMBO J*, 24, 4007-4017.
- 9.<sup>(MT29)</sup> Deng, J., Schnauffer, A., Salavati, R., Stuart, K.D. and Hol, W.G. (2004) High resolution crystal structure of a key editosome enzyme from *Trypanosoma brucei*: RNA editing ligase 1. *J Mol Biol*, 343, 601-613.
- 10.<sup>(MT54)</sup> Wu, M., Park, Y.J., Pardon, E., Turley, S., Hayhurst, A., Deng, J., Steyaert, J. and Hol, W.G. (2011) Structures of a key interaction protein from the *Trypanosoma brucei* editosome in complex with single domain antibodies. *J Struct Biol*, 174, 124-136.
- 11.<sup>(MT69)</sup> Krissinel, E. and Henrick, K. (2007) Inference of macromolecular assemblies from crystalline state. *J Mol Biol*, 372, 774-797.
